# Supplementary material for: Unimolecular decomposition of methyl ketene and its dimer in the gas phase: theory and experiment
Source: Royal Society of Chemistry journal article supplement (doi:10.1039/d0cp03921g), 2020-01-01
Supplement: d0cp03921g7.pdf [file d0cp03921g7.pdf]

**Supporting Information:**

**Unimolecular Decomposition of Methylketene and its Dimer in the Gas  
Phase: Theory and Experiment**

Imene Derbali, Helgi Rafn Hrodmarsson, Martin Schwell, Yves Bénilan, Lionel Poisson, Majdi  
Hochlaf, Mohammad Esmail Alikhani, Jean-Claude Guillemin, Emilie-Laure Zins

**Table S1:** Optimized geometries of MKE<sub>2</sub> and its cation MKE<sub>2</sub><sup>+</sup> and there calculated adiabatic ionization energies obtained at the PBE0/aug-cc-pVTZ and at the wB97XD/aug-cc-pVTZ levels of theory.

|                    | MKE <sub>2</sub>                                                                  | MKE <sub>2</sub> <sup>+</sup>                                                      | Adiabatic ionization energies |
|--------------------|-----------------------------------------------------------------------------------|------------------------------------------------------------------------------------|-------------------------------|
| PBE0/aug-cc-pVTZ   | 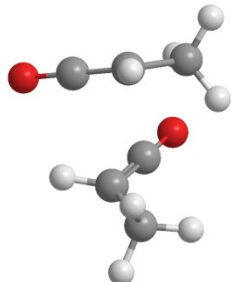 |  | 7.87                          |
| wB97XD/aug-cc-pVTZ |  |  | 7.99                          |

**Table S2:** Cartesian coordinates of neutral MKE<sub>2</sub>, ionized MKE<sub>2</sub><sup>+</sup> as obtained after geometry optimizations at the PBE0/aug-cc-pVTZ and wB97XD/aug-cc-pVTZ levels of theory.

|                    | MKE <sub>2</sub> |           |           |           | MKE <sub>2</sub> <sup>+</sup> |           |           |           |
|--------------------|------------------|-----------|-----------|-----------|-------------------------------|-----------|-----------|-----------|
| PBE0/aug-cc-pVTZ   | C                | 1.226164  | -1.021245 | 1.541321  | C                             | 0.977419  | 2.077796  | -0.086779 |
|                    | C                | 1.379187  | -0.885781 | 0.053309  | C                             | 1.021153  | 0.724703  | 0.550486  |
|                    | C                | 1.956057  | 0.136636  | -0.519617 | C                             | 1.821348  | -0.254862 | 0.100618  |
|                    | O                | 2.461352  | 1.052823  | -1.025248 | O                             | 2.451172  | -1.113366 | -0.305871 |
|                    | H                | 1.690279  | -1.942428 | 1.899641  | C                             | -1.787814 | 0.252600  | -0.214863 |
|                    | H                | 0.169945  | -1.041700 | 1.820752  | C                             | -1.009754 | -0.806921 | -0.483437 |
|                    | H                | 1.695335  | -0.188396 | 2.064910  | C                             | -1.047450 | -2.059986 | 0.335140  |
|                    | H                | 0.988196  | -1.640896 | -0.617997 | O                             | -2.405943 | 1.177502  | 0.034405  |
|                    | C                | -1.942512 | -0.441413 | -0.411432 | H                             | 1.635218  | 2.759719  | 0.460718  |
|                    | C                | -2.060343 | 0.514606  | 0.472061  | H                             | -0.030338 | 2.493163  | -0.023109 |
|                    | C                | -1.183228 | 1.732987  | 0.504541  | H                             | 1.294302  | 2.057840  | -1.127879 |
|                    | O                | -1.846071 | -1.294921 | -1.193611 | H                             | 0.665659  | 0.575230  | 1.566211  |
|                    | H                | -2.852930 | 0.377684  | 1.198056  | H                             | -1.713330 | -2.786879 | -0.139565 |
|                    | H                | -1.782238 | 2.644235  | 0.447799  | H                             | -0.056538 | -2.515626 | 0.371130  |
|                    | H                | -0.598577 | 1.773249  | 1.426966  | H                             | -1.400381 | -1.883355 | 1.349477  |
|                    | H                | -0.484213 | 1.740302  | -0.330349 | H                             | -0.605834 | -0.813156 | -1.492253 |
| wB97XD/aug-cc-pVTZ | C                | 1.135395  | -0.548302 | 1.749262  | C                             | 0.810539  | 2.101735  | 0.004879  |
|                    | C                | 1.349763  | -0.838812 | 0.286575  | C                             | 0.955940  | 0.715924  | 0.566040  |
|                    | C                | 2.003009  | -0.041472 | -0.515089 | C                             | 1.841254  | -0.163186 | 0.065375  |
|                    | O                | 2.577788  | 0.674189  | -1.225050 | O                             | 2.538547  | -0.938106 | -0.388817 |
|                    | H                | 1.524292  | -1.357987 | 2.366655  | C                             | -1.801915 | 0.155262  | -0.255232 |
|                    | H                | 0.071651  | -0.435004 | 1.963943  | C                             | -0.919245 | -0.836496 | -0.457950 |
|                    | H                | 1.638947  | 0.369426  | 2.048213  | C                             | -0.900762 | -2.069501 | 0.401943  |
|                    | H                | 0.943189  | -1.732277 | -0.166549 | O                             | -2.500392 | 1.029989  | -0.052866 |
|                    | C                | -1.965914 | -0.501773 | -0.353814 | H                             | 1.462064  | 2.786882  | 0.549741  |
|                    | C                | -2.071985 | 0.610651  | 0.323039  | H                             | -0.211168 | 2.451937  | 0.144753  |
|                    | C                | -1.144098 | 1.784326  | 0.150224  | H                             | 1.064251  | 2.148081  | -1.051178 |
|                    | O                | -1.880192 | -1.492262 | -0.951858 | H                             | 0.639196  | 0.493495  | 1.578466  |
|                    | H                | -2.882798 | 0.644186  | 1.037588  | H                             | -1.493299 | -2.854702 | -0.069664 |
|                    | H                | -1.702808 | 2.685449  | -0.102847 | H                             | 0.117371  | -2.445929 | 0.492121  |
|                    | H                | -0.589054 | 1.979377  | 1.069117  | H                             | -1.301515 | -1.883443 | 1.395056  |
|                    | H                | -0.421209 | 1.603702  | -0.642029 | H                             | -0.497017 | -0.853808 | -1.456159 |

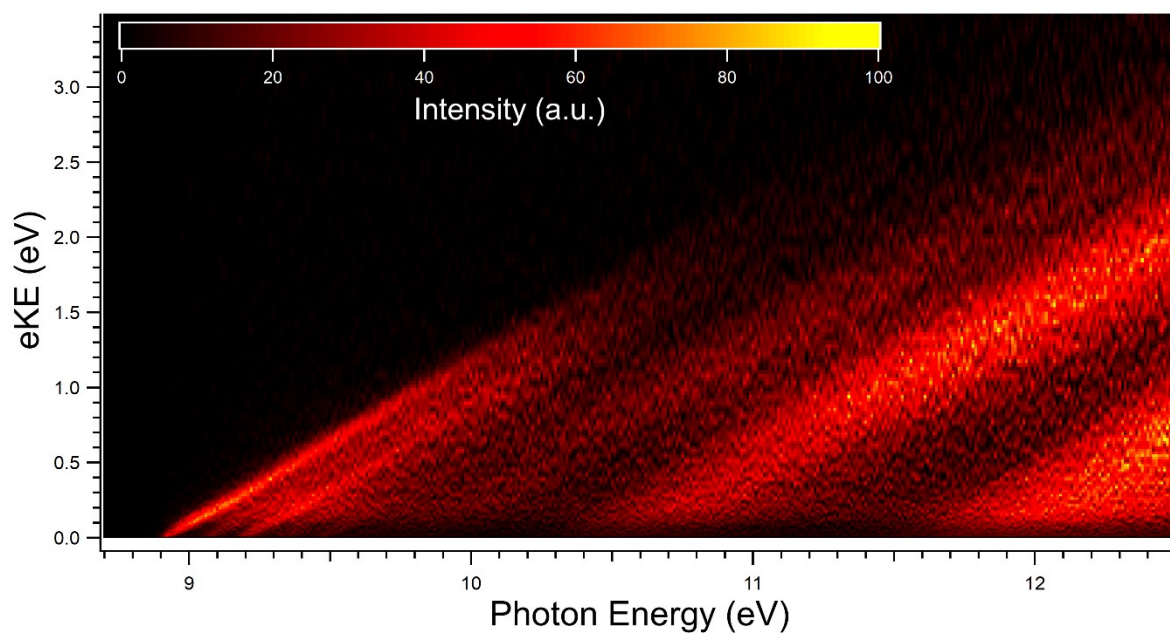

**Figure S1.** 2D-PES matrix of the  $m/z$  56 mass signals.

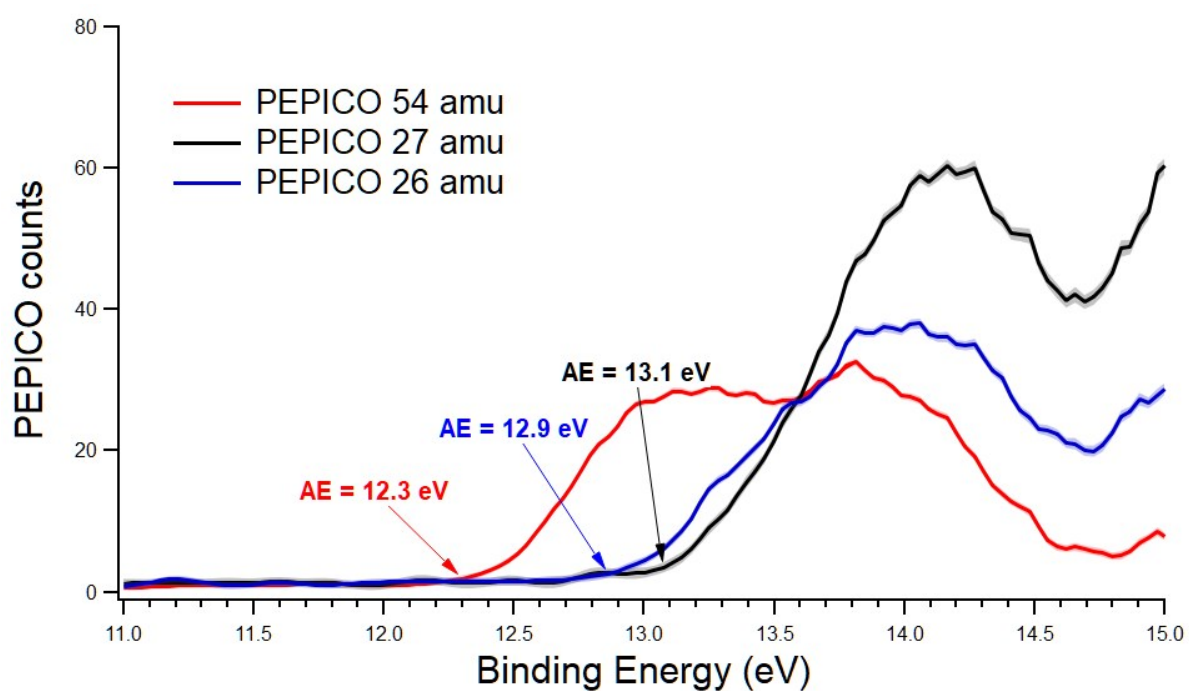

**Figure S2.** Mass selected PEPICO spectra obtained at 15.5 eV for  $m/z$  54 (red),  $m/z$  27 (black) and  $m/z$  26 (blue). The appearance energies are derived as the first point where the signal increases above the background. This method is less accurate than using recorded SPES and hence we give an estimated error of 0.1 eV for the derived appearance energies.

**Table S3:** Cartesian coordinates of neutral MKE, ionized MKE and its fragments as obtained after geometry optimizations at the CCSD (T)-F12/cc-pVTZ-F12 level of theory.

|                                              |               |               |               |                                               |               |               |               |
|----------------------------------------------|---------------|---------------|---------------|-----------------------------------------------|---------------|---------------|---------------|
| C <sub>3</sub> H <sub>4</sub> O              |               |               |               | C <sub>3</sub> H <sub>4</sub> O <sup>+</sup>  |               |               |               |
| C                                            | -1.6835996785 | -0.3306593240 | -0.0000180628 | C                                             | -1.6771932832 | -0.3442653468 | 0.0001182243  |
| C                                            | -0.4813060320 | 0.5822873294  | 0.0000257105  | C                                             | -0.5220531179 | 0.5837508947  | 0.0001138047  |
| C                                            | 0.7526353148  | 0.1262125525  | -0.0000361211 | C                                             | 0.7844428304  | 0.1168639687  | -0.0000887145 |
| O                                            | 1.8448718328  | -0.2845982987 | -0.0001070977 | O                                             | 1.8422077592  | -0.2765816933 | -0.0002865560 |
| H                                            | -2.3008893352 | -0.1618850329 | -0.8831006750 | H                                             | -2.2949103857 | -0.1216438613 | -0.8769343890 |
| H                                            | -2.3007023705 | -0.1622351975 | 0.8832630473  | H                                             | -2.2939505177 | -0.1227565128 | 0.8781521156  |
| H                                            | -1.3780280750 | -1.3763389699 | -0.0002606010 | H                                             | -1.3866719594 | -1.3908983926 | -0.0006637606 |
| C <sub>3</sub> H <sub>3</sub> O <sup>+</sup> |               |               |               | C <sub>2</sub> H <sub>3</sub> <sup>+</sup>    |               |               |               |
| C                                            | -1.3415905194 | -0.4160344059 | 0.4546761816  | C                                             | -0.6125918687 | -0.0772930734 | -0.0000449781 |
| C                                            | -0.3239588476 | 0.4688524157  | 0.4505025777  | C                                             | 0.6126722375  | -0.0773587446 | -0.0001313718 |
| C                                            | 0.9879869372  | -0.0417745839 | 0.4446716469  | H                                             | -1.6903309849 | -0.0709653605 | -0.0005232490 |
| O                                            | 2.0333603206  | -0.4481189207 | 0.4390378199  | H                                             | 1.6904116286  | -0.0706727247 | 0.0002868030  |
| H                                            | -2.3608732403 | -0.0518705411 | 0.4591216137  | H                                             | -0.0001340124 | 1.0473079032  | -0.0000032041 |
| H                                            | -1.1778296628 | -1.4865868159 | 0.4529499665  |                                               |               |               |               |
| H                                            | -0.4130949877 | 1.5485328517  | 0.4520401936  |                                               |               |               |               |
| C <sub>3</sub> H <sub>2</sub> O <sup>+</sup> |               |               |               | C <sub>2</sub> H <sub>4</sub> <sup>+</sup> _1 |               |               |               |
| C                                            | 0.5117570972  | -0.6259750498 | 0.0000000000  | C                                             | 0.7253572054  | -0.1328836903 | -0.0942607431 |
| C                                            | 0.0021893679  | 0.6681399976  | 0.0000000000  | C                                             | -0.6153527566 | 0.0422801726  | -0.0589134432 |
| O                                            | -0.2023064021 | -1.6349797642 | 0.0000000000  | H                                             | 1.6132516684  | 0.4859531528  | -0.0112312927 |
| C                                            | -0.3875368200 | 1.8169295191  | 0.0000000000  | H                                             | -1.2888589146 | -0.8072373213 | -0.1677649898 |
| H                                            | 1.5977951174  | -0.8459258166 | 0.0000000000  | H                                             | 0.0587060314  | -0.2295186937 | 1.0330641262  |
| H                                            | -0.7387433603 | 2.8298761139  | 0.0000000000  | H                                             | -1.0435072340 | 1.0435123799  | 0.0504473426  |
| C <sub>2</sub> OH                            |               |               |               | C <sub>2</sub> OH <sup>+</sup>                |               |               |               |
| C                                            | -0.9908396727 | -0.0548506181 | 0.0000000000  | C                                             | -1.1153716462 | -0.1226308642 | 0.0000000000  |
| C                                            | 0.2402905378  | -0.4825619496 | 0.0000000000  | C                                             | 0.2673755009  | -0.4811108247 | 0.0000000000  |
| O                                            | 1.2518511619  | -1.0721840225 | 0.0000000000  | O                                             | 1.2539508361  | -1.0307821896 | 0.0000000000  |
| H                                            | -1.4113020268 | 0.9325965901  | 0.0000000000  | H                                             | -1.3159546907 | 0.9575238785  | 0.0000000000  |
| HCO <sup>+</sup>                             |               |               |               | CH <sub>2</sub> O <sup>+</sup>                |               |               |               |
| C                                            | 0.0000000000  | 0.0000000000  | -0.5172798898 | C                                             | -0.0000035186 | -0.5313459258 | -0.0000000002 |
| O                                            | 0.0000000000  | 0.0000000000  | 0.5905155470  | O                                             | 0.0000075170  | 0.6626776664  | -0.0000000004 |
| H                                            | 0.0000000000  | 0.0000000000  | -1.6108956572 | H                                             | -0.0000319992 | -1.0779518700 | -0.9705085941 |
|                                              |               |               |               | H                                             | -0.0000319992 | -1.0779518705 | 0.9705085942  |
| C <sub>2</sub> H <sub>4</sub>                |               |               |               | C <sub>2</sub> H <sub>4</sub> <sup>+</sup>    |               |               |               |
| C                                            | 0.6668209247  | -0.0000184102 | 0.0002794630  | C                                             | 0.7012972277  | -0.0000206895 | 0.0001142941  |
| C                                            | -0.6668205986 | 0.0000274047  | 0.0002816600  | C                                             | -0.7012969173 | 0.0000258878  | 0.0001102854  |
| H                                            | 1.2309854972  | -0.9236495911 | 0.0005519684  | H                                             | 1.2540868174  | -0.9208237665 | -0.1608712191 |
| H                                            | 1.2310486376  | 0.9235742781  | 0.0005441274  | H                                             | 1.2540228220  | 0.9206519565  | 0.1621335332  |
| H                                            | -1.2309851471 | 0.9236585929  | 0.0005803085  | H                                             | -1.2540869497 | 0.9208345838  | -0.1608408218 |
| H                                            | -1.2310483137 | -0.9235652744 | 0.0005734728  | H                                             | -1.2540220000 | -0.9206409720 | 0.1621649282  |

|                                            |               |               |               |                                            |              |              |               |
|--------------------------------------------|---------------|---------------|---------------|--------------------------------------------|--------------|--------------|---------------|
| CO                                         |               |               |               | CO <sup>+</sup>                            |              |              |               |
| C                                          | 0.0000000000  | 0.0000000000  | -0.6465754168 | C                                          | 0.0000000000 | 0.0000000000 | -0.6380070863 |
| O                                          | 0.0000000000  | 0.0000000000  | 0.4840774168  | O                                          | 0.0000000000 | 0.0000000000 | 0.4788530863  |
| C <sub>2</sub> H <sub>3</sub>              |               |               |               | C <sub>2</sub> H <sub>2</sub> <sup>+</sup> |              |              |               |
| C                                          | -0.7105978953 | -0.1520528045 | -0.0001448734 | C                                          | 0.0000000000 | 0.0000000000 | 0.6250554878  |
| C                                          | 0.5897028040  | 0.0273704924  | -0.0000676627 | C                                          | 0.0000000000 | 0.0000000000 | -0.6250554878 |
| H                                          | -1.5921428740 | 0.4693229862  | 0.0000263161  | H                                          | 0.0000000000 | 0.0000000000 | 1.7037339807  |
| H                                          | 1.0214515636  | 1.0279432494  | 0.0000225666  | H                                          | 0.0000000000 | 0.0000000000 | -1.7037339807 |
| H                                          | 1.2842164018  | -0.8052729235 | 0.0000456534  |                                            |              |              |               |
| C <sub>2</sub> H <sub>2</sub> <sup>+</sup> |               |               |               |                                            |              |              |               |
| C                                          | 0.0000000000  | 0.0000000000  | 0.6027520933  |                                            |              |              |               |
| C                                          | 0.0000000000  | 0.0000000000  | -0.6027520933 |                                            |              |              |               |
| H                                          | 0.0000000000  | 0.0000000000  | 1.6658833002  |                                            |              |              |               |
| H                                          | 0.0000000000  | 0.0000000000  | -1.6658833002 |                                            |              |              |               |

**Table S4:** Cartesian coordinates of neutral MKE<sub>2</sub>, ionized MKE<sub>2</sub> and its fragments as obtained after geometry optimizations at the PBE0/aug-cc-pVTZ level of theory.

|                                                 |           |           |           |                                                             |           |           |           |
|-------------------------------------------------|-----------|-----------|-----------|-------------------------------------------------------------|-----------|-----------|-----------|
| (C <sub>3</sub> H <sub>4</sub> O) <sub>2</sub>  |           |           |           | (C <sub>3</sub> H <sub>4</sub> O) <sub>2</sub> <sup>+</sup> |           |           |           |
| C                                               | 1.226164  | -1.021245 | 1.541321  | C                                                           | 0.977419  | 2.077796  | -0.086779 |
| C                                               | 1.379187  | -0.885781 | 0.053309  | C                                                           | 1.021153  | 0.724703  | 0.550486  |
| C                                               | 1.956057  | 0.136636  | -0.519617 | C                                                           | 1.821348  | -0.254862 | 0.100618  |
| O                                               | 2.461352  | 1.052823  | -1.025248 | O                                                           | 2.451172  | -1.113366 | -0.305871 |
| H                                               | 1.690279  | -1.942428 | 1.899641  | C                                                           | -1.787814 | 0.252600  | -0.214863 |
| H                                               | 0.169945  | -1.041700 | 1.820752  | C                                                           | -1.009754 | -0.806921 | -0.483437 |
| H                                               | 1.695335  | -0.188396 | 2.064910  | C                                                           | -1.047450 | -2.059986 | 0.335140  |
| H                                               | 0.988196  | -1.640896 | -0.617997 | O                                                           | -2.405943 | 1.177502  | 0.034405  |
| C                                               | -1.942512 | -0.441413 | -0.411432 | H                                                           | 1.635218  | 2.759719  | 0.460718  |
| C                                               | -2.060343 | 0.514606  | 0.472061  | H                                                           | -0.030338 | 2.493163  | -0.023109 |
| C                                               | -1.183228 | 1.732987  | 0.504541  | H                                                           | 1.294302  | 2.057840  | -1.127879 |
| O                                               | -1.846071 | -1.294921 | -1.193611 | H                                                           | 0.665659  | 0.575230  | 1.566211  |
| H                                               | -2.852930 | 0.377684  | 1.198056  | H                                                           | -1.713330 | -2.786879 | -0.139565 |
| H                                               | -1.782238 | 2.644235  | 0.447799  | H                                                           | -0.056538 | -2.515626 | 0.371130  |
| H                                               | -0.598577 | 1.773249  | 1.426966  | H                                                           | -1.400381 | -1.883355 | 1.349477  |
| H                                               | -0.484213 | 1.740302  | -0.330349 | H                                                           | -0.605834 | -0.813156 | -1.492253 |
| C <sub>3</sub> H <sub>5</sub> O <sup>+</sup>    |           |           |           | C <sub>3</sub> H <sub>5</sub> O <sup>+</sup> _1             |           |           |           |
| C                                               | 0.797992  | 0.133284  | -0.000011 | C                                                           | -0.898812 | 0.798235  | 0.000000  |
| O                                               | 1.817881  | -0.313257 | 0.000005  | C                                                           | -0.934549 | -0.761771 | 0.000000  |
| C                                               | -0.521914 | 0.663523  | -0.000002 | C                                                           | 0.271325  | -0.016567 | 0.000000  |
| C                                               | -1.581030 | -0.460909 | -0.000001 | O                                                           | 1.516343  | -0.119357 | 0.000000  |
| H                                               | -0.583664 | 1.308666  | 0.888099  | H                                                           | -1.155901 | 1.326192  | 0.916000  |
| H                                               | -0.583680 | 1.308672  | -0.888074 | H                                                           | -1.155901 | 1.326192  | -0.916000 |
| H                                               | -1.496720 | -1.078661 | 0.891699  | H                                                           | -1.215462 | -1.277818 | -0.916000 |
| H                                               | -1.496770 | -1.078613 | -0.891737 | H                                                           | -1.216462 | -1.277818 | 0.916000  |
| H                                               | -2.552506 | 0.030602  | 0.000058  | H                                                           | 1.985198  | 0.738722  | 0.000000  |
| C <sub>3</sub> H <sub>5</sub> O <sup>+</sup> _2 |           |           |           | C <sub>3</sub> H <sub>5</sub> O                             |           |           |           |
| C                                               | -1.778340 | 0.135117  | -0.000212 | C                                                           | -1.867472 | -0.161956 | 0.015726  |
| C                                               | -0.443592 | -0.440572 | 0.000258  | C                                                           | -0.486950 | 0.400861  | -0.040666 |
| C                                               | 0.729027  | 0.348201  | 0.000652  | C                                                           | 0.613046  | -0.318578 | -0.015841 |
| O                                               | 1.879659  | -0.113156 | -0.000377 | O                                                           | 1.887098  | 0.043628  | 0.100548  |
| H                                               | -2.333126 | -0.255026 | -0.866791 | H                                                           | -2.410638 | 0.218223  | 0.885335  |
| H                                               | -1.803254 | 1.222195  | -0.000359 | H                                                           | -1.844363 | -1.249705 | 0.078969  |
| H                                               | -2.333521 | -0.254754 | 0.866249  | H                                                           | -2.445245 | 0.117654  | -0.869391 |
| H                                               | -0.301151 | -1.517590 | 0.000132  | H                                                           | -0.372638 | 1.483622  | -0.121101 |
| H                                               | 0.691216  | 1.453947  | -0.000402 | H                                                           | 2.424361  | -0.440783 | -0.533509 |
| C <sub>3</sub> H <sub>3</sub> O <sup>+</sup>    |           |           |           | C <sub>3</sub> H <sub>3</sub> O                             |           |           |           |
| C                                               | 1.606482  | -0.382833 | 0.000008  | C                                                           | 1.699290  | -0.348240 | 0.000002  |
| C                                               | 0.629816  | 0.540848  | -0.000003 | C                                                           | 0.578726  | 0.498553  | 0.000004  |
| C                                               | -0.693217 | 0.114470  | 0.000049  | C                                                           | -0.696475 | 0.106171  | 0.000001  |



|            |           |           |           |             |           |           |           |
|------------|-----------|-----------|-----------|-------------|-----------|-----------|-----------|
| O          | -1.760653 | -0.217468 | -0.000025 | O           | -1.808365 | -0.222249 | -0.000004 |
| H          | 2.643132  | -0.064385 | -0.000057 | H           | 2.687230  | 0.083594  | -0.000060 |
| H          | 1.403453  | -1.448006 | -0.000018 | H           | 1.596732  | -1.422646 | 0.000031  |
| H          | 0.780158  | 1.617230  | -0.000049 | H           | 0.693708  | 1.578147  | 0.000021  |
| $C_3H_6O$  |           |           |           | $C_3H_6O^+$ |           |           |           |
| C          | -1.881030 | 0.113698  | 0.000050  | C           | 1.858067  | 0.123779  | 0.000119  |
| C          | -0.491300 | -0.425176 | -0.000070 | C           | 0.509909  | -0.415674 | -0.000099 |
| C          | 0.589636  | 0.341352  | -0.000087 | C           | -0.639603 | 0.382096  | 0.000085  |
| O          | 1.851384  | -0.175527 | 0.000065  | O           | -1.790249 | -0.198645 | 0.000092  |
| H          | -2.440841 | -0.220867 | 0.878470  | H           | 2.408912  | -0.279268 | 0.862976  |
| H          | -2.441267 | -0.221703 | -0.877771 | H           | 1.906747  | 1.210432  | 0.000741  |
| H          | -1.884942 | 1.205699  | -0.000469 | H           | 2.408484  | -0.277785 | -0.863805 |
| H          | -0.355899 | -1.502765 | -0.000088 | H           | 0.355103  | -1.492168 | -0.000463 |
| H          | 0.518926  | 1.426584  | -0.000087 | H           | -0.587208 | 1.469293  | -0.000550 |
| H          | 2.489115  | 0.538024  | 0.000068  | H           | -2.540281 | 0.417441  | -0.000269 |
| $C_3H_2O$  |           |           |           | $C_3H_2O^+$ |           |           |           |
| C          | 0.910473  | 1.581763  | 0.000000  | C           | 0.498476  | -0.621087 | 0.000000  |
| C          | 0.000000  | 0.629043  | 0.000000  | C           | 0.000000  | 0.665929  | 0.000000  |
| C          | -0.313538 | -0.622530 | 0.000000  | O           | -0.195748 | -1.640484 | 0.000000  |
| O          | -0.774037 | -1.691621 | 0.000000  | C           | -0.381378 | 1.810136  | 0.000000  |
| H          | 0.631735  | 2.632816  | 0.000000  | H           | 1.590817  | -0.832481 | 0.000000  |
| H          | 1.978947  | 1.370499  | 0.000000  | H           | -0.727424 | 2.826482  | 0.000000  |
| $C_2H_3^+$ |           |           |           | $C_2H_2^+$  |           |           |           |
| C          | -0.609103 | -0.075078 | -0.000001 | C           | 0.000000  | 0.000000  | 0.627339  |
| C          | 0.609114  | -0.075097 | 0.000005  | C           | 0.000000  | 0.000000  | -0.627339 |
| H          | -1.688902 | -0.075838 | -0.000007 | H           | 0.000000  | 0.000000  | 1.714910  |
| H          | 1.688914  | -0.075745 | -0.000020 | H           | 0.000000  | 0.000000  | -1.714910 |
| H          | -0.000078 | 1.052636  | 0.000000  |             |           |           |           |

**Table S5.** Cartesian coordinates of the C<sub>3</sub>H<sub>4</sub>O<sup>+</sup> isomers, other than MKE as obtained after geometry optimizations at the PBE0/aug-cc-pVTZ level of theory.

|                                                                                   |           |           |           |                                                                                    |           |           |           |
|-----------------------------------------------------------------------------------|-----------|-----------|-----------|------------------------------------------------------------------------------------|-----------|-----------|-----------|
| 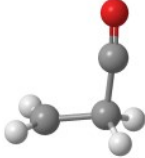 |           |           |           |  |           |           |           |
| CH <sub>2</sub> CH <sub>2</sub> CO <sup>+</sup>                                   |           |           |           | CH <sub>2</sub> =C=CHOH <sup>+</sup>                                               |           |           |           |
| C                                                                                 | 1.519231  | -0.525248 | -0.000002 | C                                                                                  | 1.923149  | -0.192517 | -0.000027 |
| C                                                                                 | 0.630976  | 0.683200  | 0.000039  | C                                                                                  | 0.647653  | 0.164274  | -0.010207 |
| C                                                                                 | -0.712120 | 0.169620  | 0.000082  | C                                                                                  | -0.630969 | 0.513486  | -0.022992 |
| O                                                                                 | -1.709459 | -0.330001 | -0.000094 | O                                                                                  | -1.641188 | -0.468243 | 0.062419  |
| H                                                                                 | 1.793271  | -0.978910 | -0.941473 | H                                                                                  | 2.701527  | 0.514552  | 0.390421  |
| H                                                                                 | 1.792279  | -0.979593 | 0.941440  | H                                                                                  | 2.221900  | -1.213532 | -0.356764 |
| H                                                                                 | 0.730732  | 1.316554  | 0.892403  | H                                                                                  | -0.911580 | 1.585274  | -0.205512 |
| H                                                                                 | 0.730872  | 1.316525  | -0.892335 | H                                                                                  | -2.521340 | -0.051804 | -0.128137 |

**Table S6.** Details on the calculations from Table 3 (energies in Hartree).  $\Delta ZPE$  is evaluated at the PBE0/aVTZ level using the corresponding anharmonic frequencies.

|                                                                                                                | Neutral                                                                           | Ionization                                                                        |                                                                                   | Fragments                                                                         |                                                                                   |                                                                                    |                                                                                     |                                                                                     |                                                                                     |                                                                                     |                                                                                     |                                                                                     |                                                                                     |
|----------------------------------------------------------------------------------------------------------------|-----------------------------------------------------------------------------------|-----------------------------------------------------------------------------------|-----------------------------------------------------------------------------------|-----------------------------------------------------------------------------------|-----------------------------------------------------------------------------------|------------------------------------------------------------------------------------|-------------------------------------------------------------------------------------|-------------------------------------------------------------------------------------|-------------------------------------------------------------------------------------|-------------------------------------------------------------------------------------|-------------------------------------------------------------------------------------|-------------------------------------------------------------------------------------|-------------------------------------------------------------------------------------|
|                                                                                                                | $C_3H_4O$                                                                         | $C_3H_4O^{+\circ}$                                                                | $C_3H_3O^+$                                                                       | $C_3H_2O^{+\circ}$                                                                | $C_2HO^+$                                                                         | $CH_2O^{+\circ}$                                                                   | $HCO^+$                                                                             | $C_2H_4^{+\circ}$                                                                   | $C_2H_4^{+\circ}_{-1}$                                                              | $CO^{+\circ}$                                                                       | $C_2H_3^+$                                                                          | $C_2H_2^{+\circ}$                                                                   | $CH_3^+$                                                                            |
|                                                                                                                | 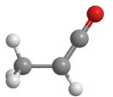 |  |  |  |  |  |  |  |  |  |  |  |  |
|                                                                                                                |                                                                                   |                                                                                   | + H                                                                               | H <sub>2</sub>                                                                    | CH <sub>3</sub>                                                                   | C <sub>2</sub> H <sub>2</sub>                                                      | C <sub>2</sub> H <sub>3</sub>                                                       | + CO                                                                                | + CO                                                                                | C <sub>2</sub> H <sub>4</sub>                                                       | H+CO                                                                                | H <sub>2</sub> +CO                                                                  | C <sub>2</sub> HO                                                                   |
|                                                                                                                |                                                                                   |                                                                                   |  |  |  |  |  |  |  |  |  |  |  |
|                                                                                                                | <b>MKE</b>                                                                        | <b>m/z = 56</b>                                                                   | <b>m/z = 55</b>                                                                   | <b>m/z = 54</b>                                                                   | <b>m/z = 41</b>                                                                   | <b>m/z = 30</b>                                                                    | <b>m/z = 29</b>                                                                     | <b>m/z = 28</b>                                                                     | <b>m/z = 28</b>                                                                     | <b>m/z = 28</b>                                                                     | <b>m/z = 27</b>                                                                     | <b>m/z = 26</b>                                                                     | <b>m/z = 15</b>                                                                     |
| $E_{\text{corr}}^{(R)} = E_{\text{F12/cc-pVTZ-F12}}^{(R)} - E_{\text{F12/cc-pVTZ-F12}}^{(R)}_{\text{CCSD(T)}}$ | -191.6727871                                                                      | -191.3444769                                                                      | -190.76708                                                                        | -190.0170729                                                                      | -151.34361                                                                        | -113.978169                                                                        | -113.434236                                                                         | -78.08131501                                                                        | -78.0383262                                                                         | -112.684811                                                                         | -77.46773556                                                                        | -76.7976175                                                                         | -39.4166771                                                                         |
| $\Delta ZPVE$                                                                                                  | 0.061127                                                                          | 0.060027                                                                          | 0.05086                                                                           | 0.035518                                                                          | 0.018075                                                                          | 0.024017                                                                           | 0.016532                                                                            | 0.048681                                                                            | 0.045396                                                                            | 0.005307                                                                            | 0.034511                                                                            | 0.026117                                                                            | 0.031245                                                                            |
| $\Delta CV$                                                                                                    | -0.19848764                                                                       | -0.1980106                                                                        | -0.19794229                                                                       | -0.19788533                                                                       | -0.14831673                                                                       | -0.10090312                                                                        | -0.1009479                                                                          | -0.09619585                                                                         | -0.09632495                                                                         | -0.10023646                                                                         | -0.09667361                                                                         | -0.09612749                                                                         | -0.04761424                                                                         |
| $\Delta SR$                                                                                                    | 0.00689882                                                                        | 0.00689129                                                                        | 0.00689727                                                                        | 0.00696941                                                                        | 0.00612191                                                                        | 0.0053068                                                                          | 0.00530276                                                                          | 0.0016243                                                                           | 0.00162836                                                                          | 0.00538693                                                                          | 0.00164178                                                                          | 0.0016518                                                                           | 0.00081066                                                                          |
| $E_{\text{corr}} = E_{\text{F12}}^{(R)} + \Delta CV + \Delta SR + \Delta ZPE$                                  | -191.8032489                                                                      | -191.4755692                                                                      | -190.907265                                                                       | -190.1724708                                                                      | -151.4677298                                                                      | -114.049748                                                                        | -113.513349                                                                         | -78.12720556                                                                        | -78.0876268                                                                         | -112.774353                                                                         | -77.52825639                                                                        | -76.8659762                                                                         | -39.4322357                                                                         |

**Table S7.** Details on the calculations from Table 4 (energies in Hartree).  $\Delta ZPE$  is evaluated at the PBE0/aVTZ level.

|                         | Neutral       | Ionization               | Fragments            |             |               |               |                     |               |             |             |            |            |
|-------------------------|---------------|--------------------------|----------------------|-------------|---------------|---------------|---------------------|---------------|-------------|-------------|------------|------------|
|                         | $(C_3H_4O)_2$ | $(C_3H_4O)_2^{+\bullet}$ | $C_3H_6O^{+\bullet}$ | $C_3H_5O^+$ | $C_3H_5O^+_1$ | $C_3H_5O^+_2$ | $C_3H_4O^{\bullet}$ | $C_3H_4O^+_1$ | $C_3H_3O^+$ | $C_3H_2O^+$ | $C_2H_3^+$ | $C_2H_2^+$ |
|                         |               |                          |                      |             |               |               |                     |               |             |             |            |            |
|                         |               |                          | $C_3H_2O$            | $C_3H_3O$   | $C_3H_3O$     | $C_3H_3O$     | $C_3H_4O$           | $C_3H_4O$     | $C_3H_5O$   | $C_3H_6O$   | $C_3H_6O$  | $C_3H_4O$  |
|                         |               |                          |                      |             |               |               |                     |               |             |             |            |            |
|                         |               |                          |                      |             |               |               |                     |               |             |             | $+CO$      | $+HCO$     |
|                         | $MKE_2$       | $m/Z = 112$              | $m/Z = 58$           | $m/Z = 57$  | $m/Z = 57$    | $m/Z = 57$    | $m/Z = 56$          | $m/Z = 56$    | $m/Z = 55$  | $m/Z = 54$  | $m/Z = 27$ | $m/Z = 26$ |
| <b>PBE0/aug-cc-pVTZ</b> | -383.41329    | -383.124181              | -192.590662          | -192.021935 | -191.973235   | -191.923076   | -191.362476         | -191.31812    | -190.805736 | -190.075952 | -77.477487 | -76.818604 |

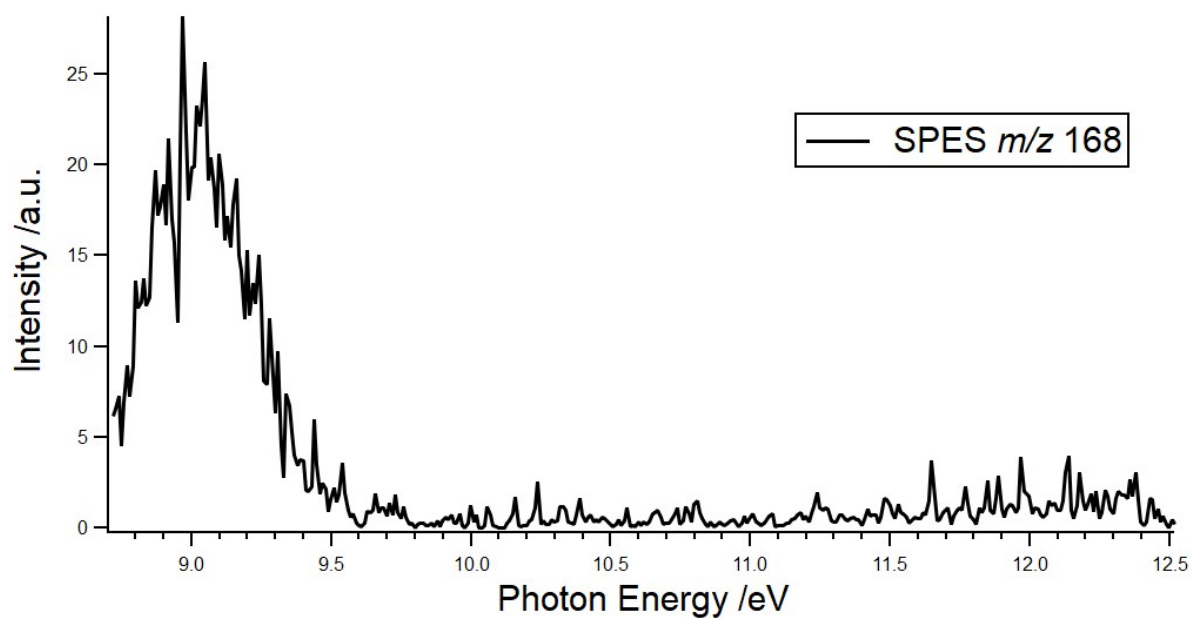

**Figure S3.** The SPES corresponding to the MKE trimer ( $m/z$  168).

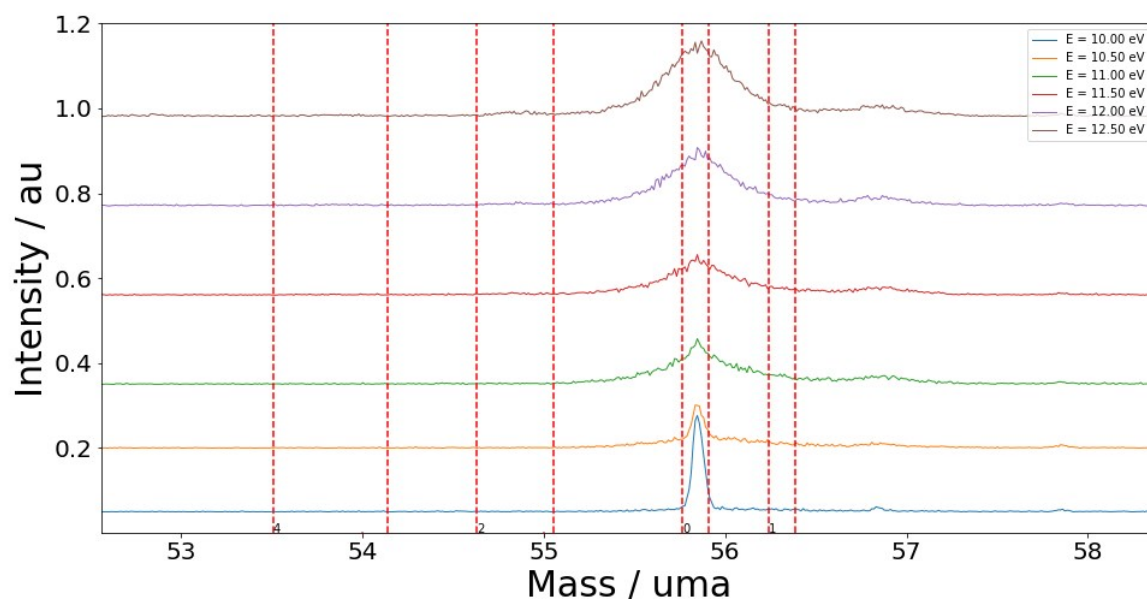

**Figure S4.** Peak evolution of the  $m/z$  56 signal with increasing photon energy.

**Table S8.** Attribution of excited states of the MKE cation ( $m/z$  56) calculated at the MRCI/aVTZ level of theory (in eV).

|                               |       |
|-------------------------------|-------|
| Ground State                  | 8.917 |
| 1 <sup>st</sup> excited state | 13.51 |
| 2 <sup>nd</sup> excited state | 14.21 |

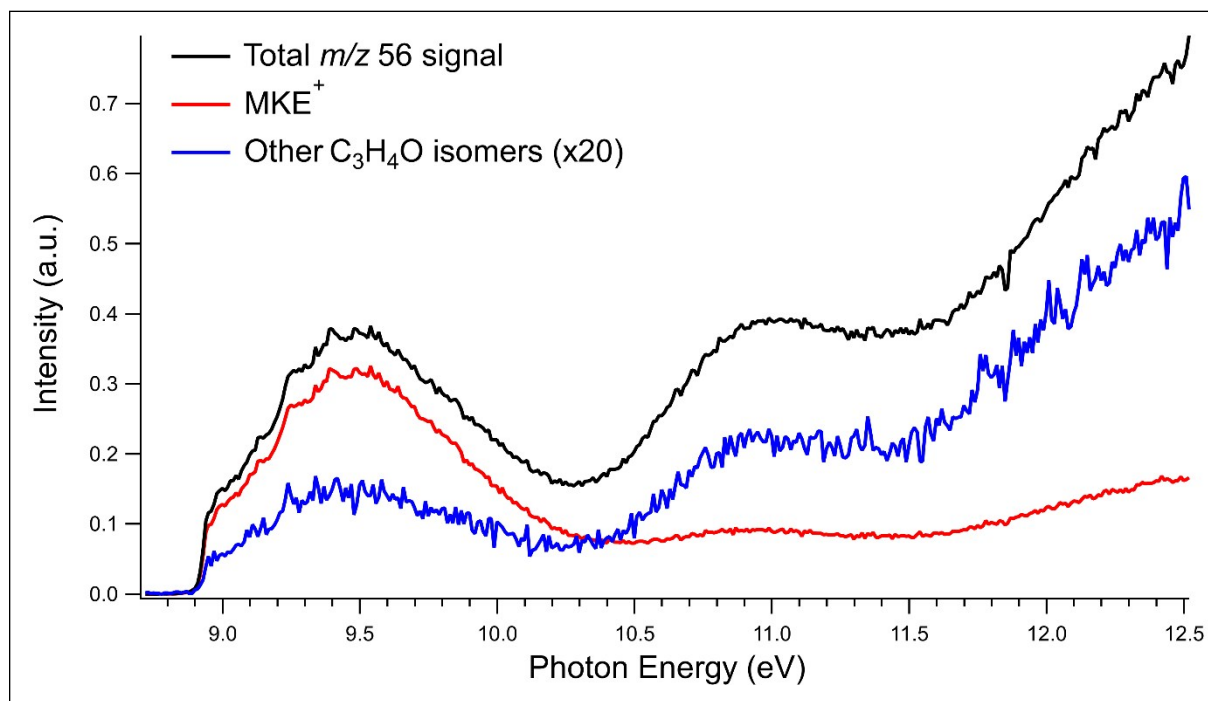

**Figure S5.** Total ion yield (TIY) of the  $m/z$  56 signal (black). By employing the same filtering as was done on the  $m/z$  56 SPES the signal can be disentangled into the contribution of the ionized MKE monomer (red) and that of the C<sub>3</sub>H<sub>4</sub>O<sup>+</sup> fragments formed by dissociative ionization of the MKE dimer.
