# Supplementary figures and images for: Unimolecular decomposition of methyl ketene and its dimer in the gas phase: theory and experiment
Source: Royal Society of Chemistry journal article supplement (doi:10.1039/d0cp03921g), 2020-01-01

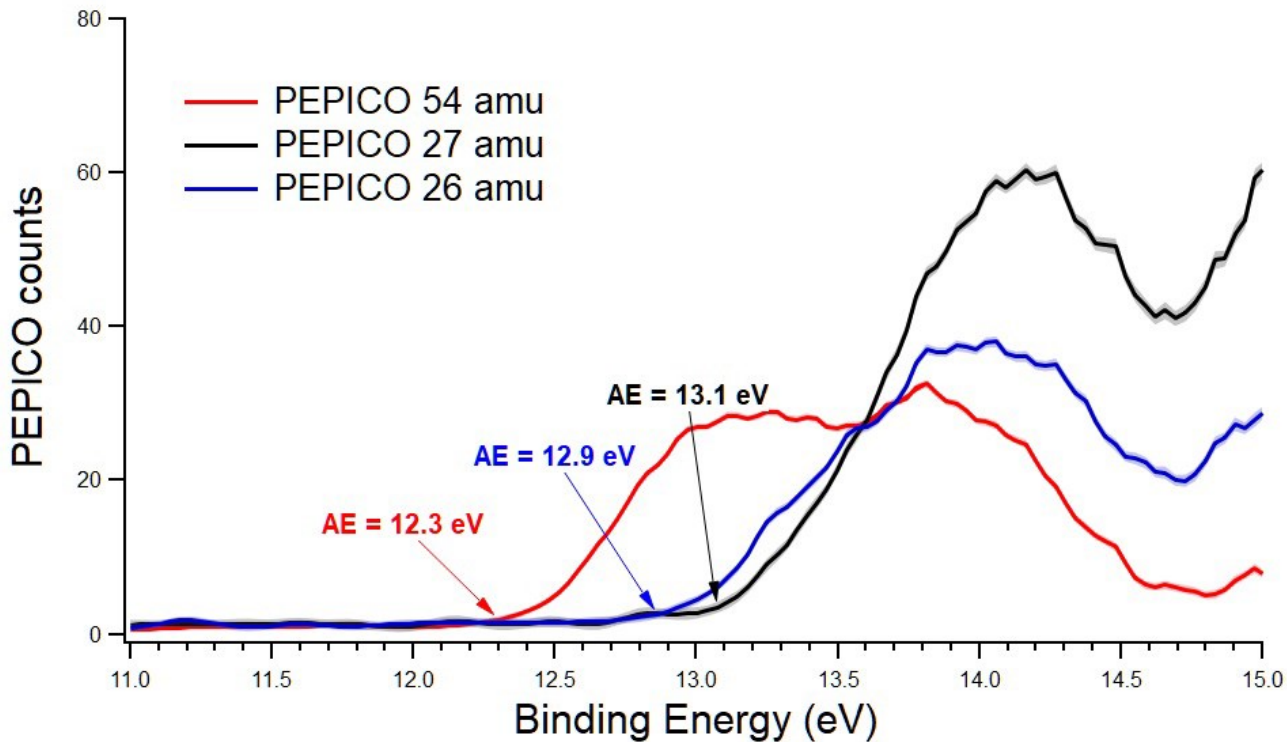

Supplement: d0cp03921g3.pdf [file d0cp03921g3.pdf]

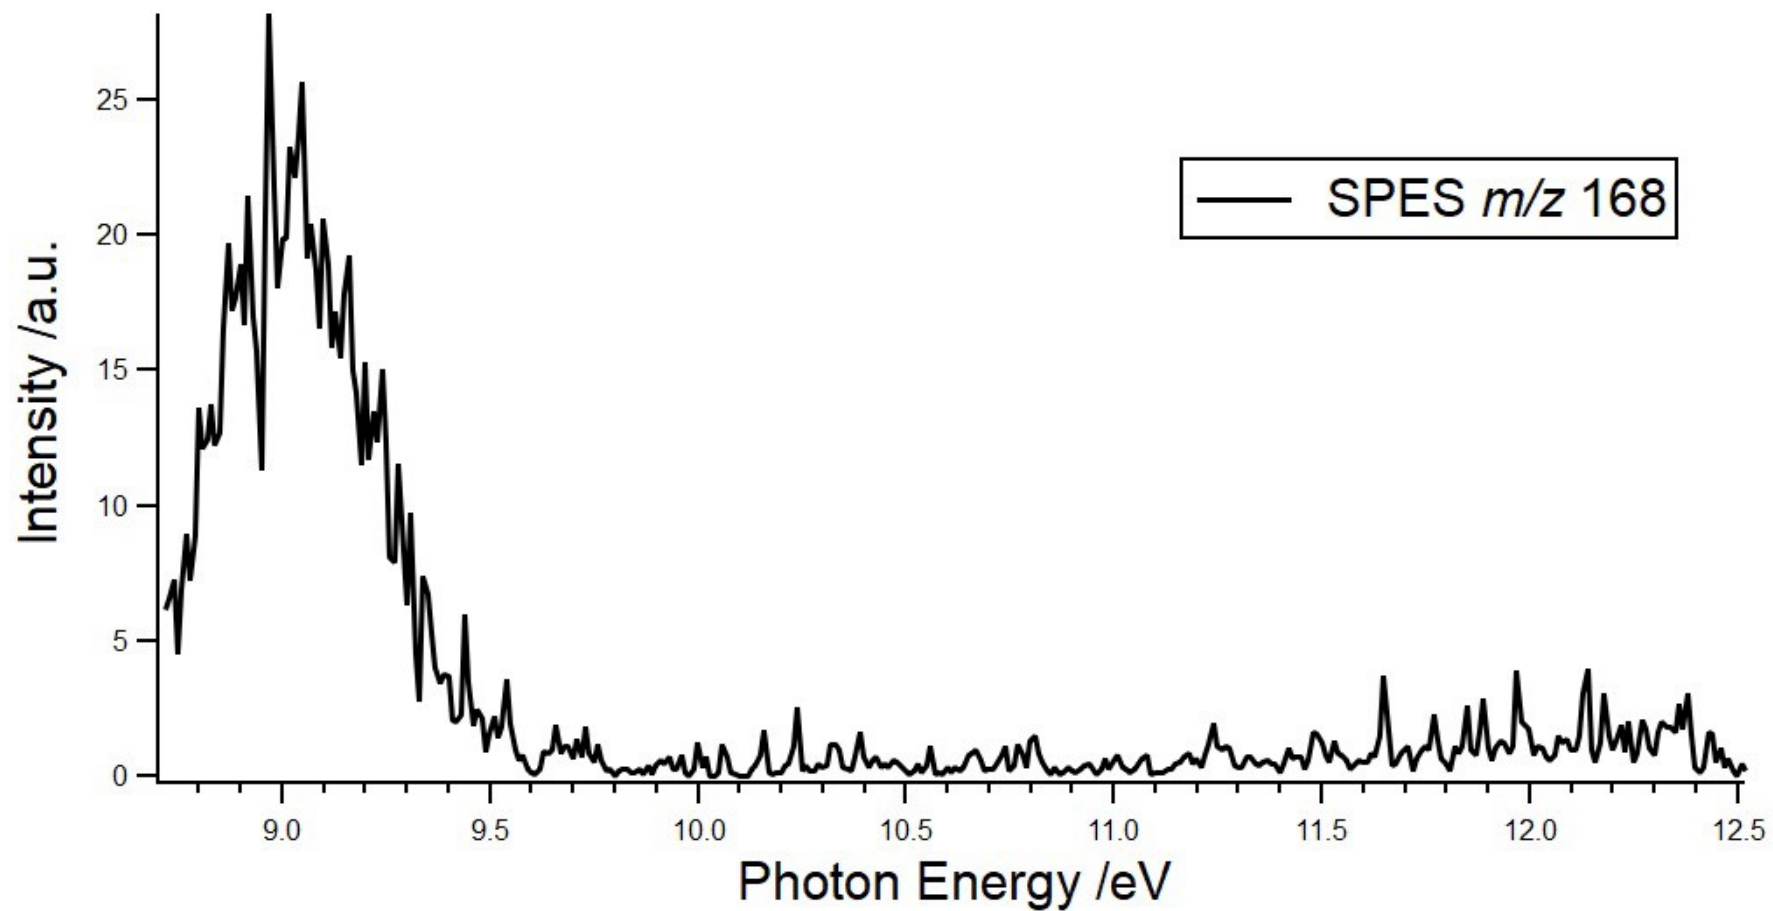

Supplement: d0cp03921g4.pdf [file d0cp03921g4.pdf]

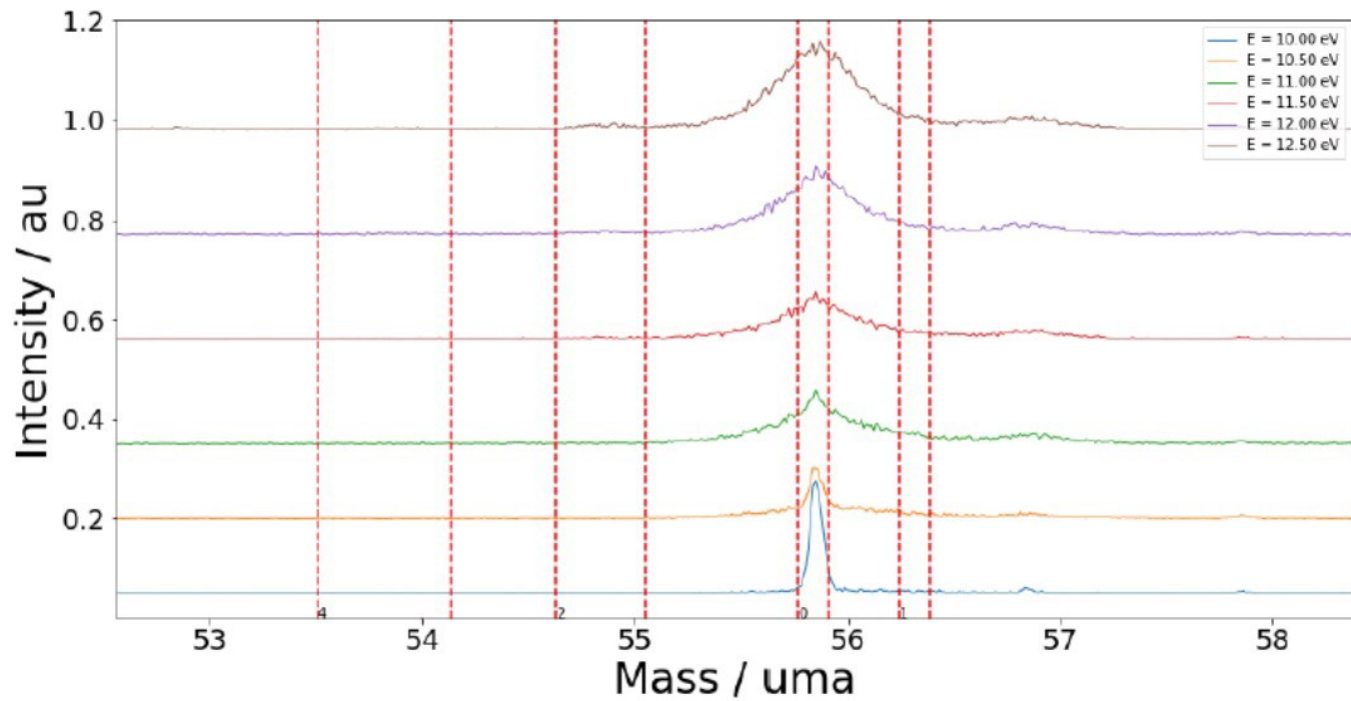

Supplement: d0cp03921g5.pdf [file d0cp03921g5.pdf]

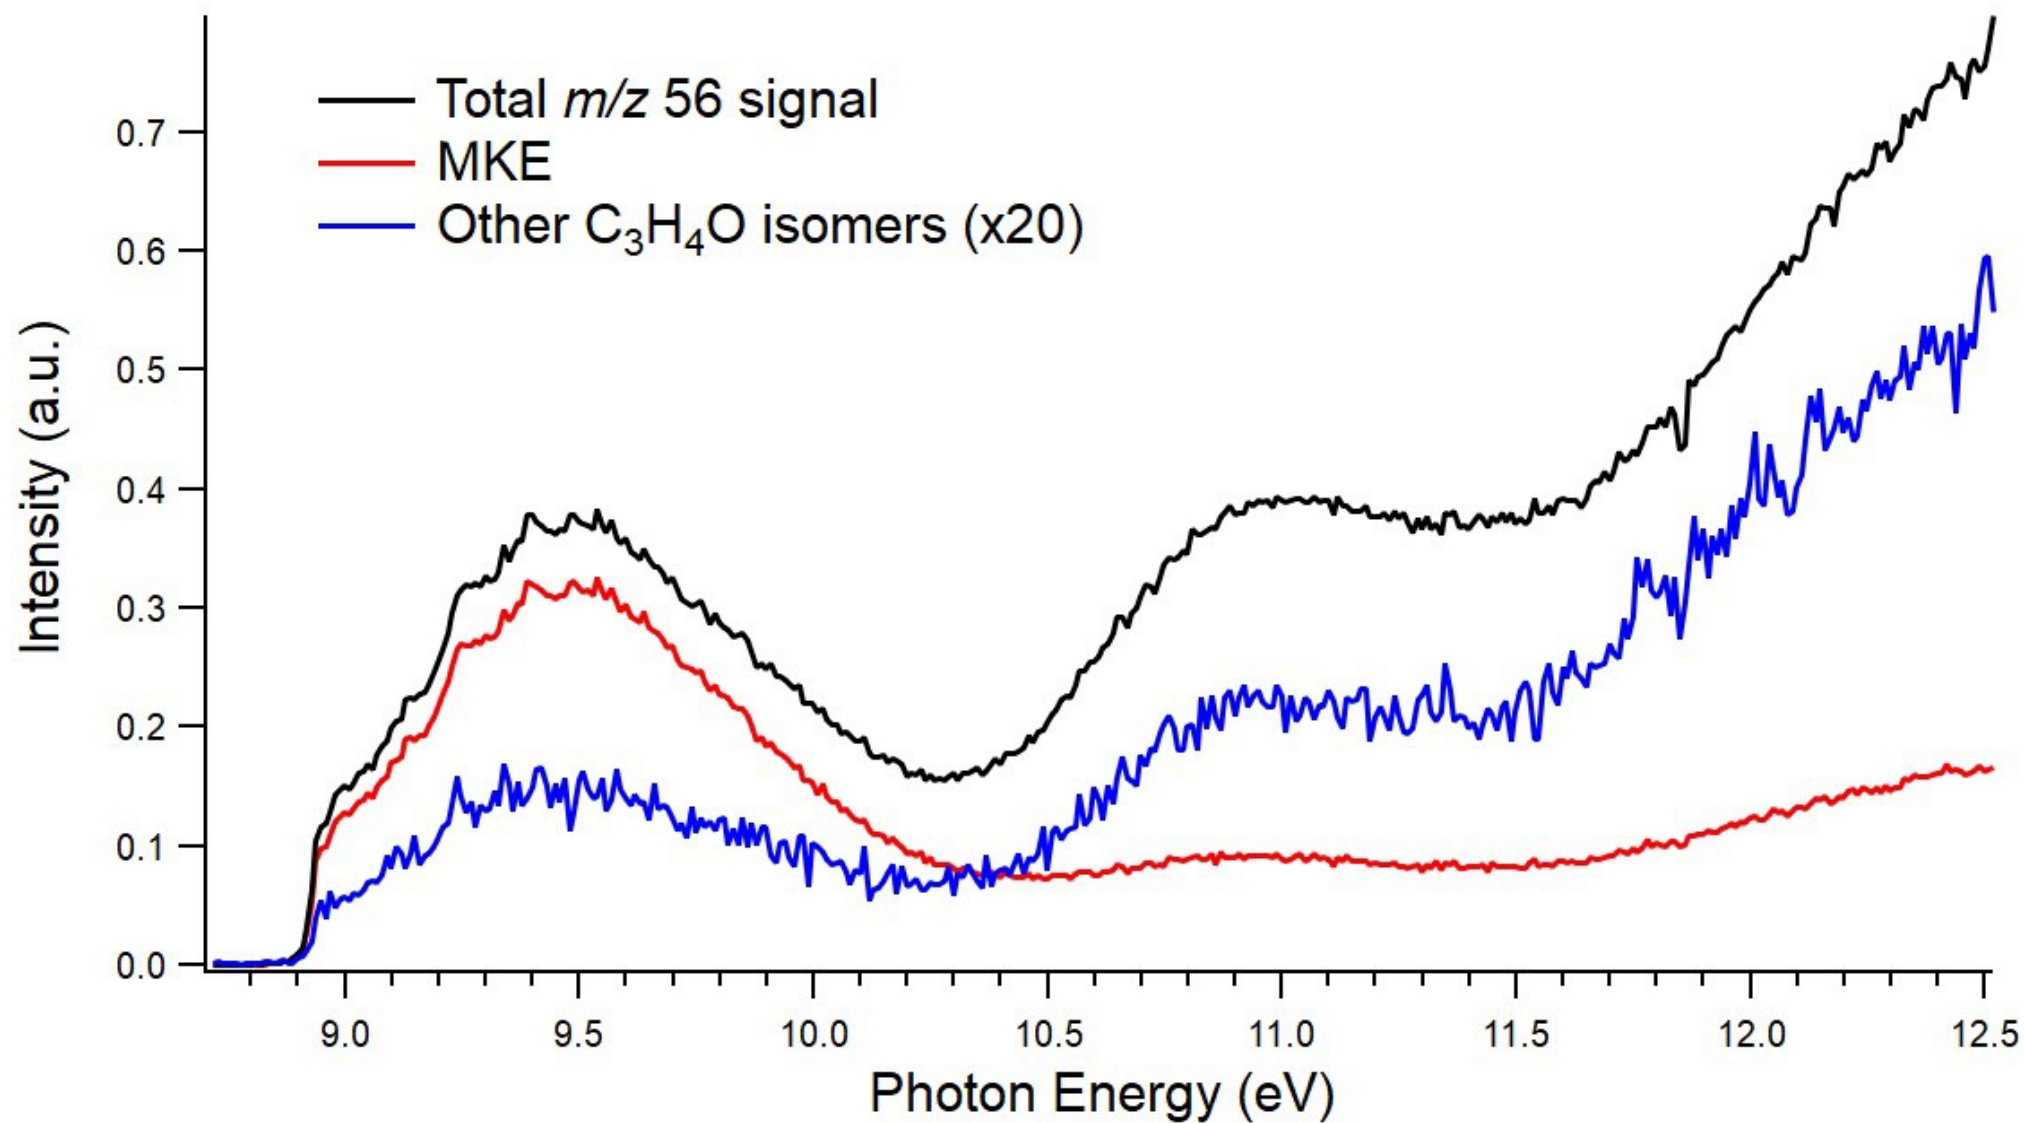

Supplement: d0cp03921g6.pdf [file d0cp03921g6.pdf]
